# Supplementary material
Source: Research Square preprint supplement (doi:10.21203/rs.3.rs-9350683/v1)
Supplement: Supplementary file 1 [file be5e876b7f017ce5f7df231d.docx]

**Supporting Information for *Food Analytical Methods***

**A Rapid and Sensitive Multi-Residue Colloidal Gold Lateral Flow Immunoassay for Simultaneous Detection of Pesticide Residues in Complex Food Matrices**

Zizhe Li*a*, Xiaole Pan*a*, Chen Xing*a*, Yantong Pan*a,b*, Zhanhui Wang*a,b*, Jiancheng Li*a,b**

*a* *Technology Innovation Center for Food Safety Surveillance and Detection (Hainan), Sanya Institute of China Agricultural University, Sanya, 572025, People’s Republic of China*

*b National Key Laboratory of Veterinary Public Health and Safety, Beijing Key Laboratory of Detection Technology for Animal Derived Food Safety, College of Veterinary Medicine, China Agricultural University, Beijing, 100193, People’s Republic of China*

** Author to whom correspondence should be addressed*

*E-mail: horse20@cau.edu.cn*


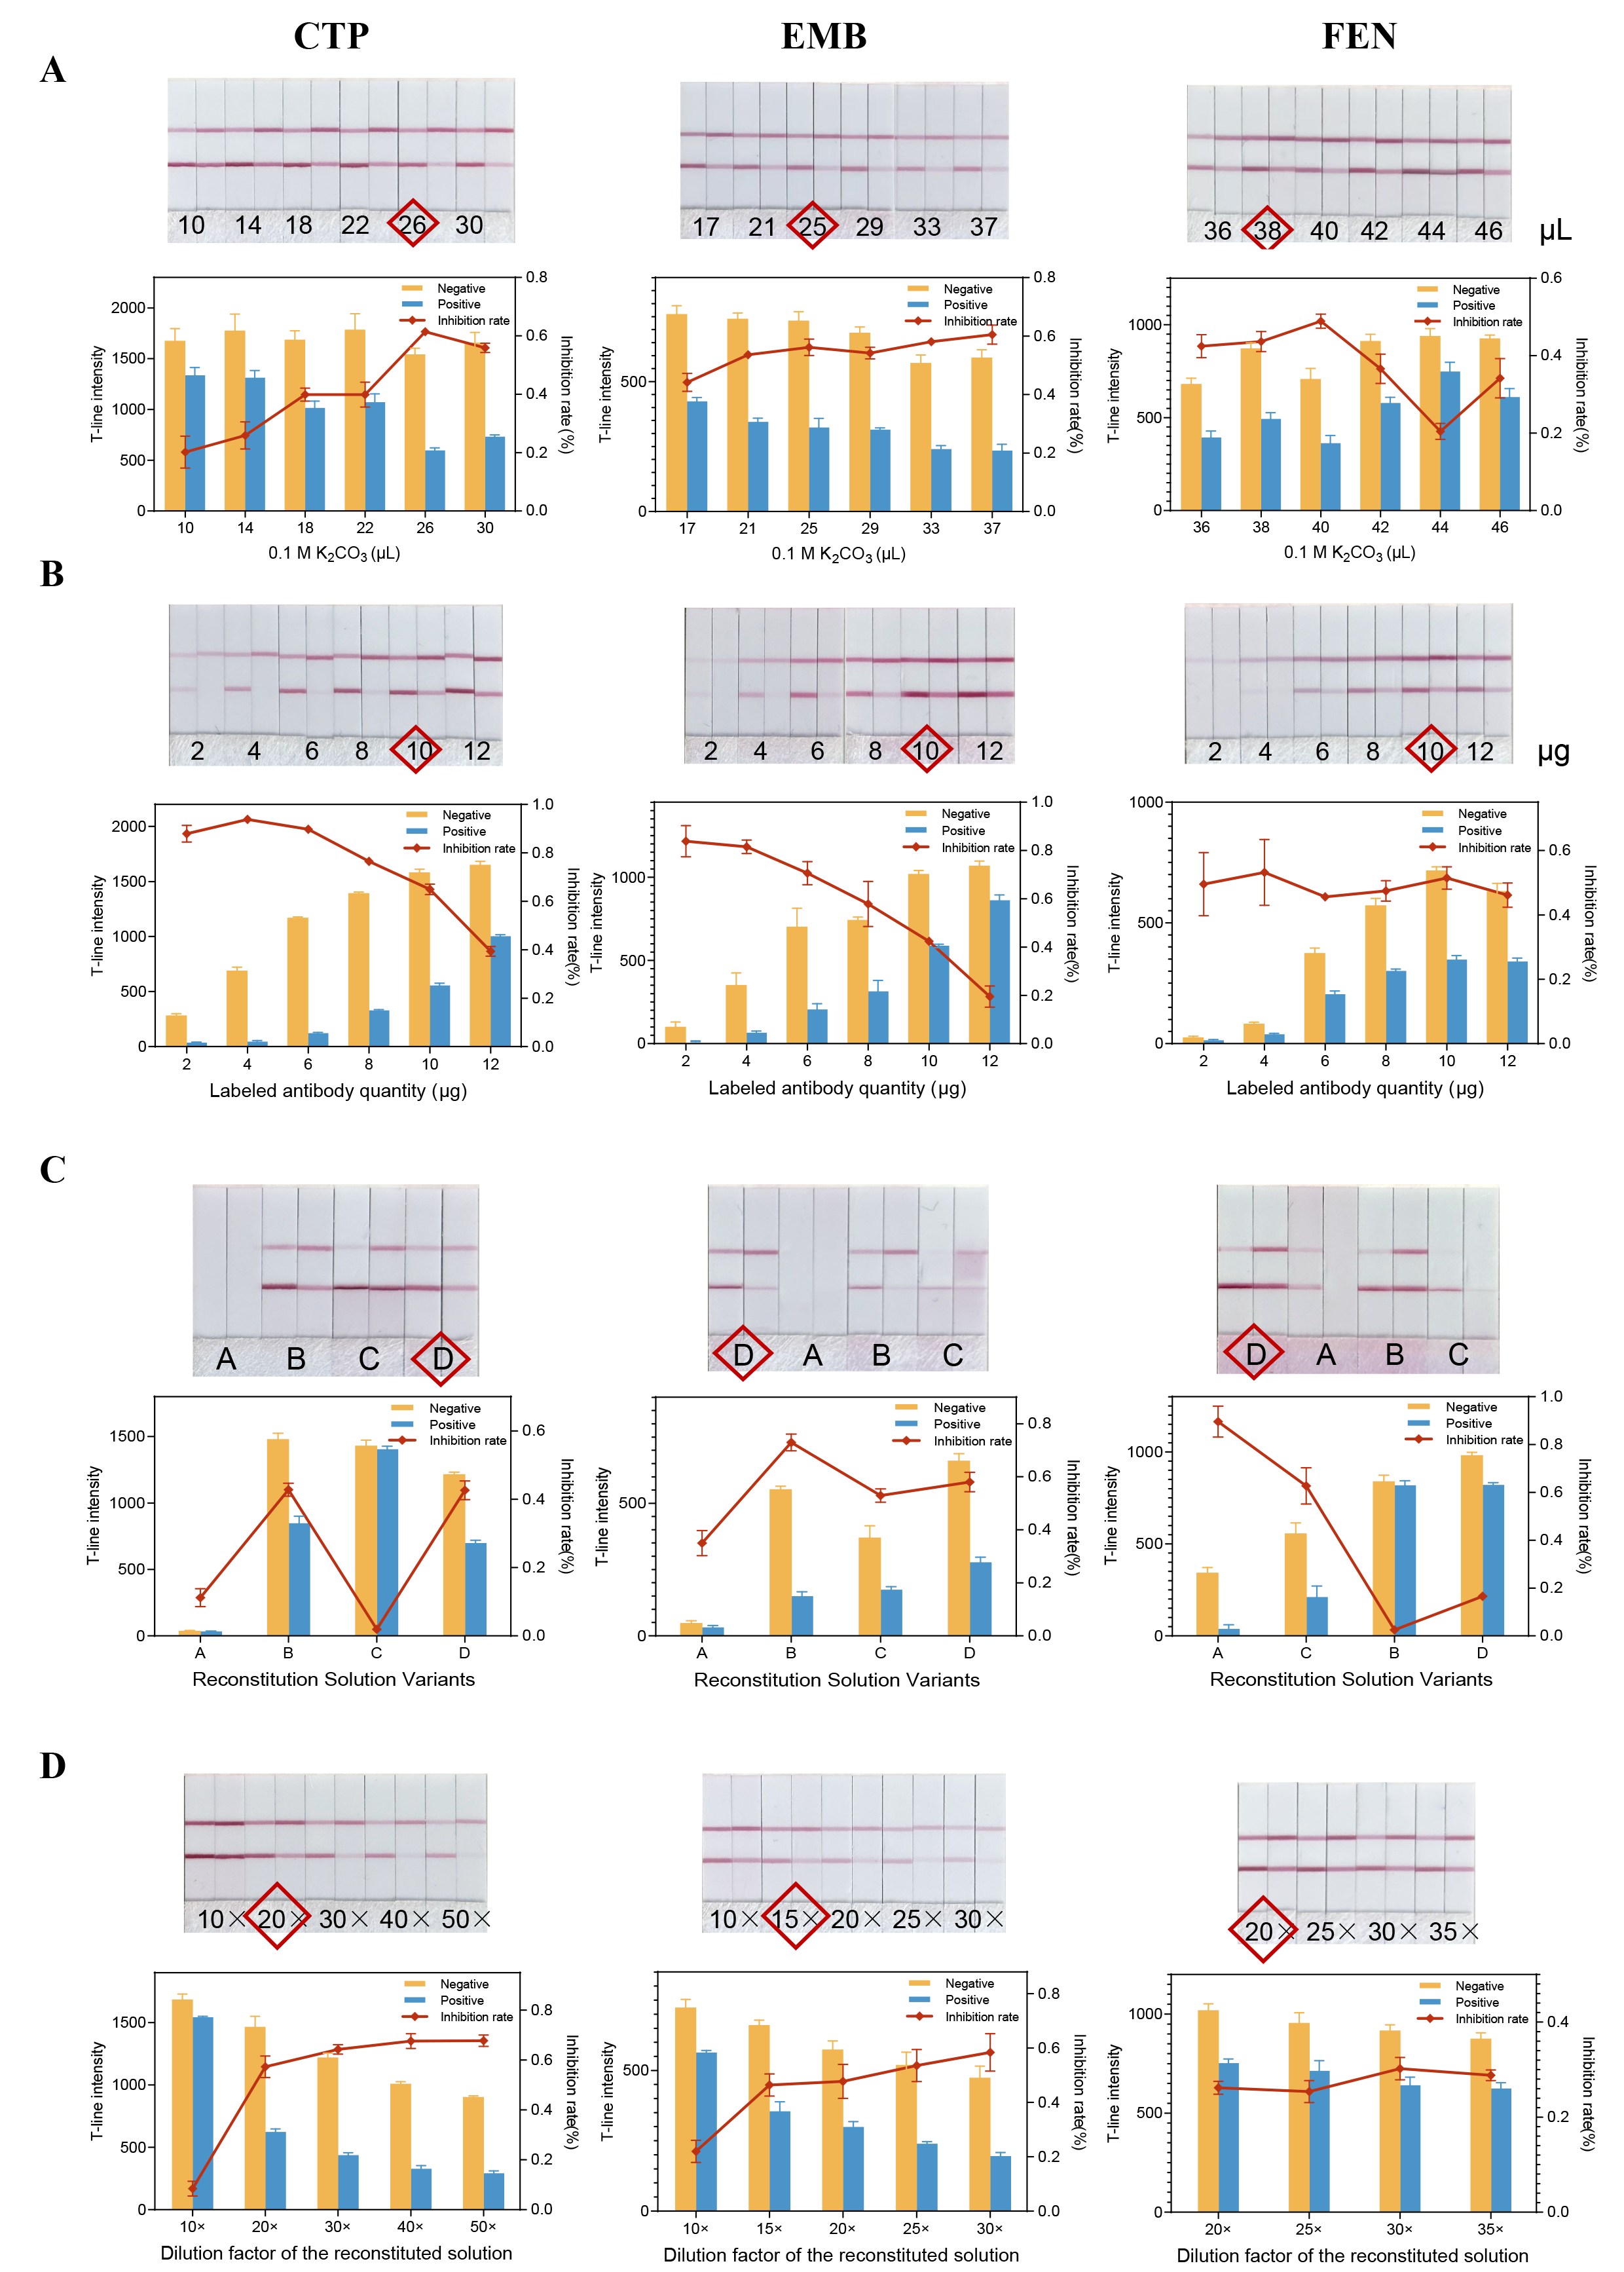


**Figure S1**. Optimization of assay conditions for the single-residue CG-LFIA. (A) Effect of pH on assay performance. (B) Effect of antibody loading amount. (C) Effect of the reconstitution buffer type. (D) Effect of the dilution factor of the reconstitution buffer.
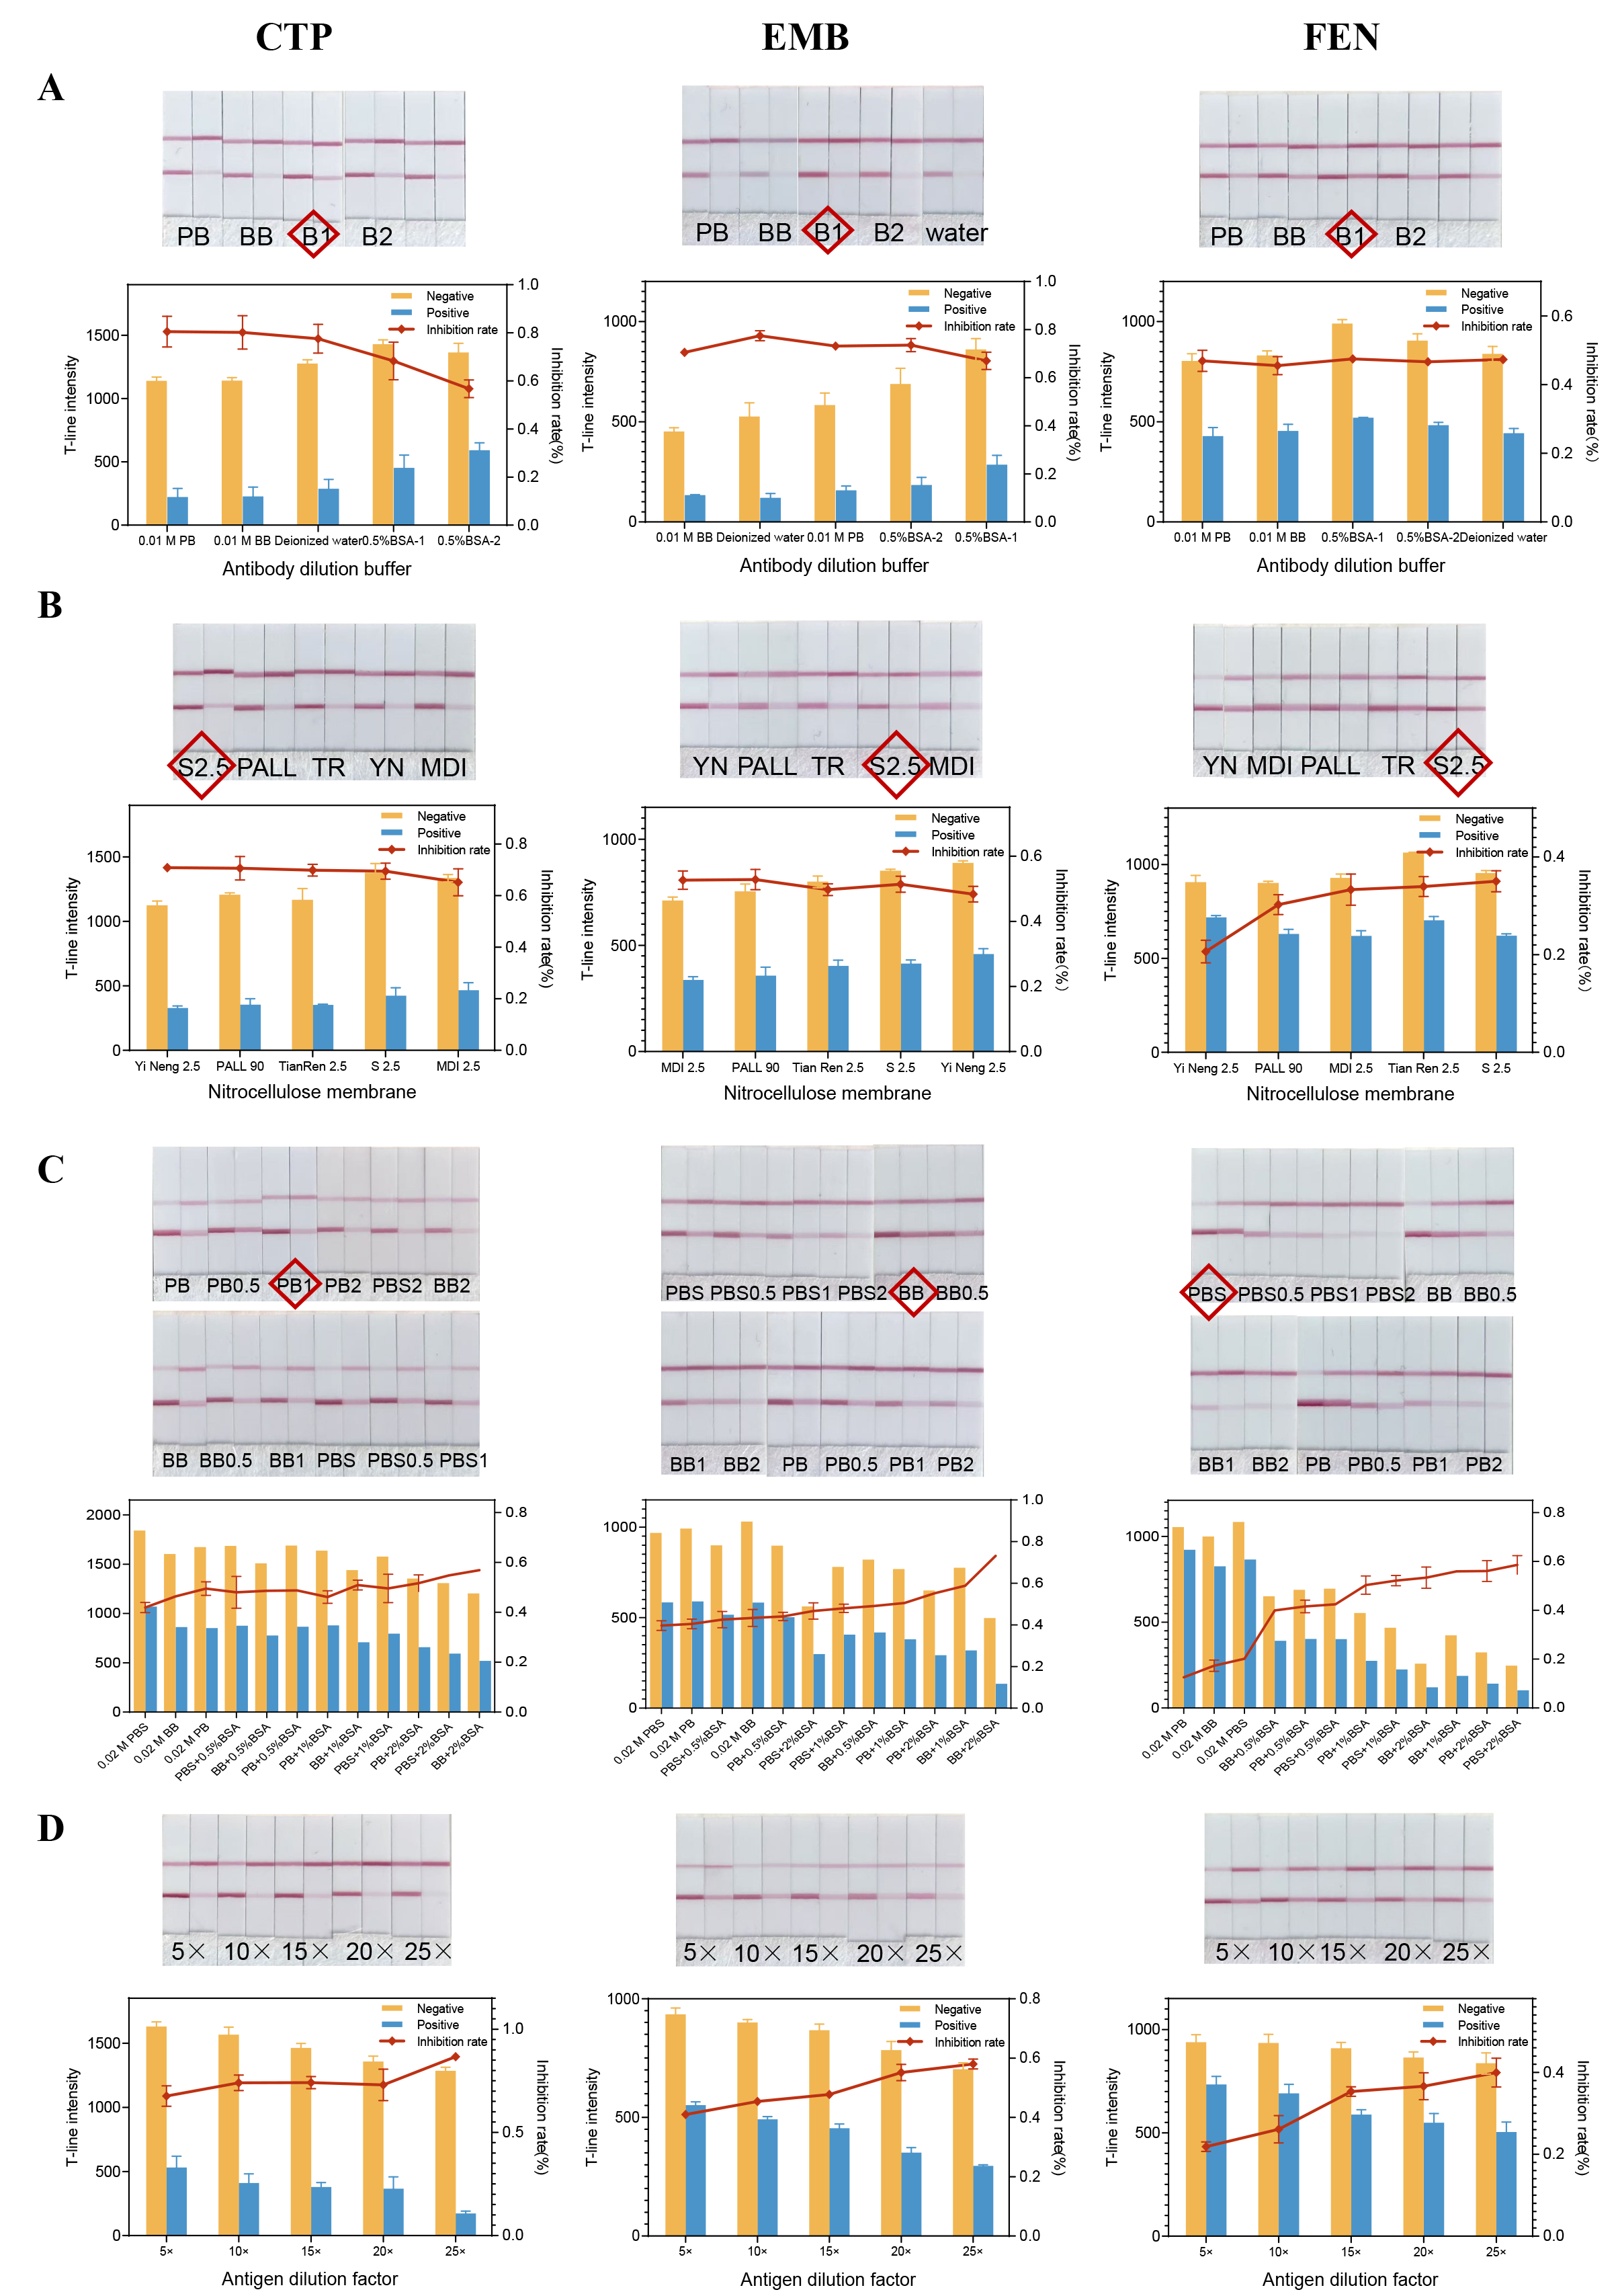


**Figure S2**. Optimization of assay parameters for the single-residue CG-LFIA. (A) Optimization of the antibody dilution buffer. (B) Optimization of the NC membrane type. (C) Optimization of the coating buffer type. (D) Optimization of the coating antigen dilution factor.


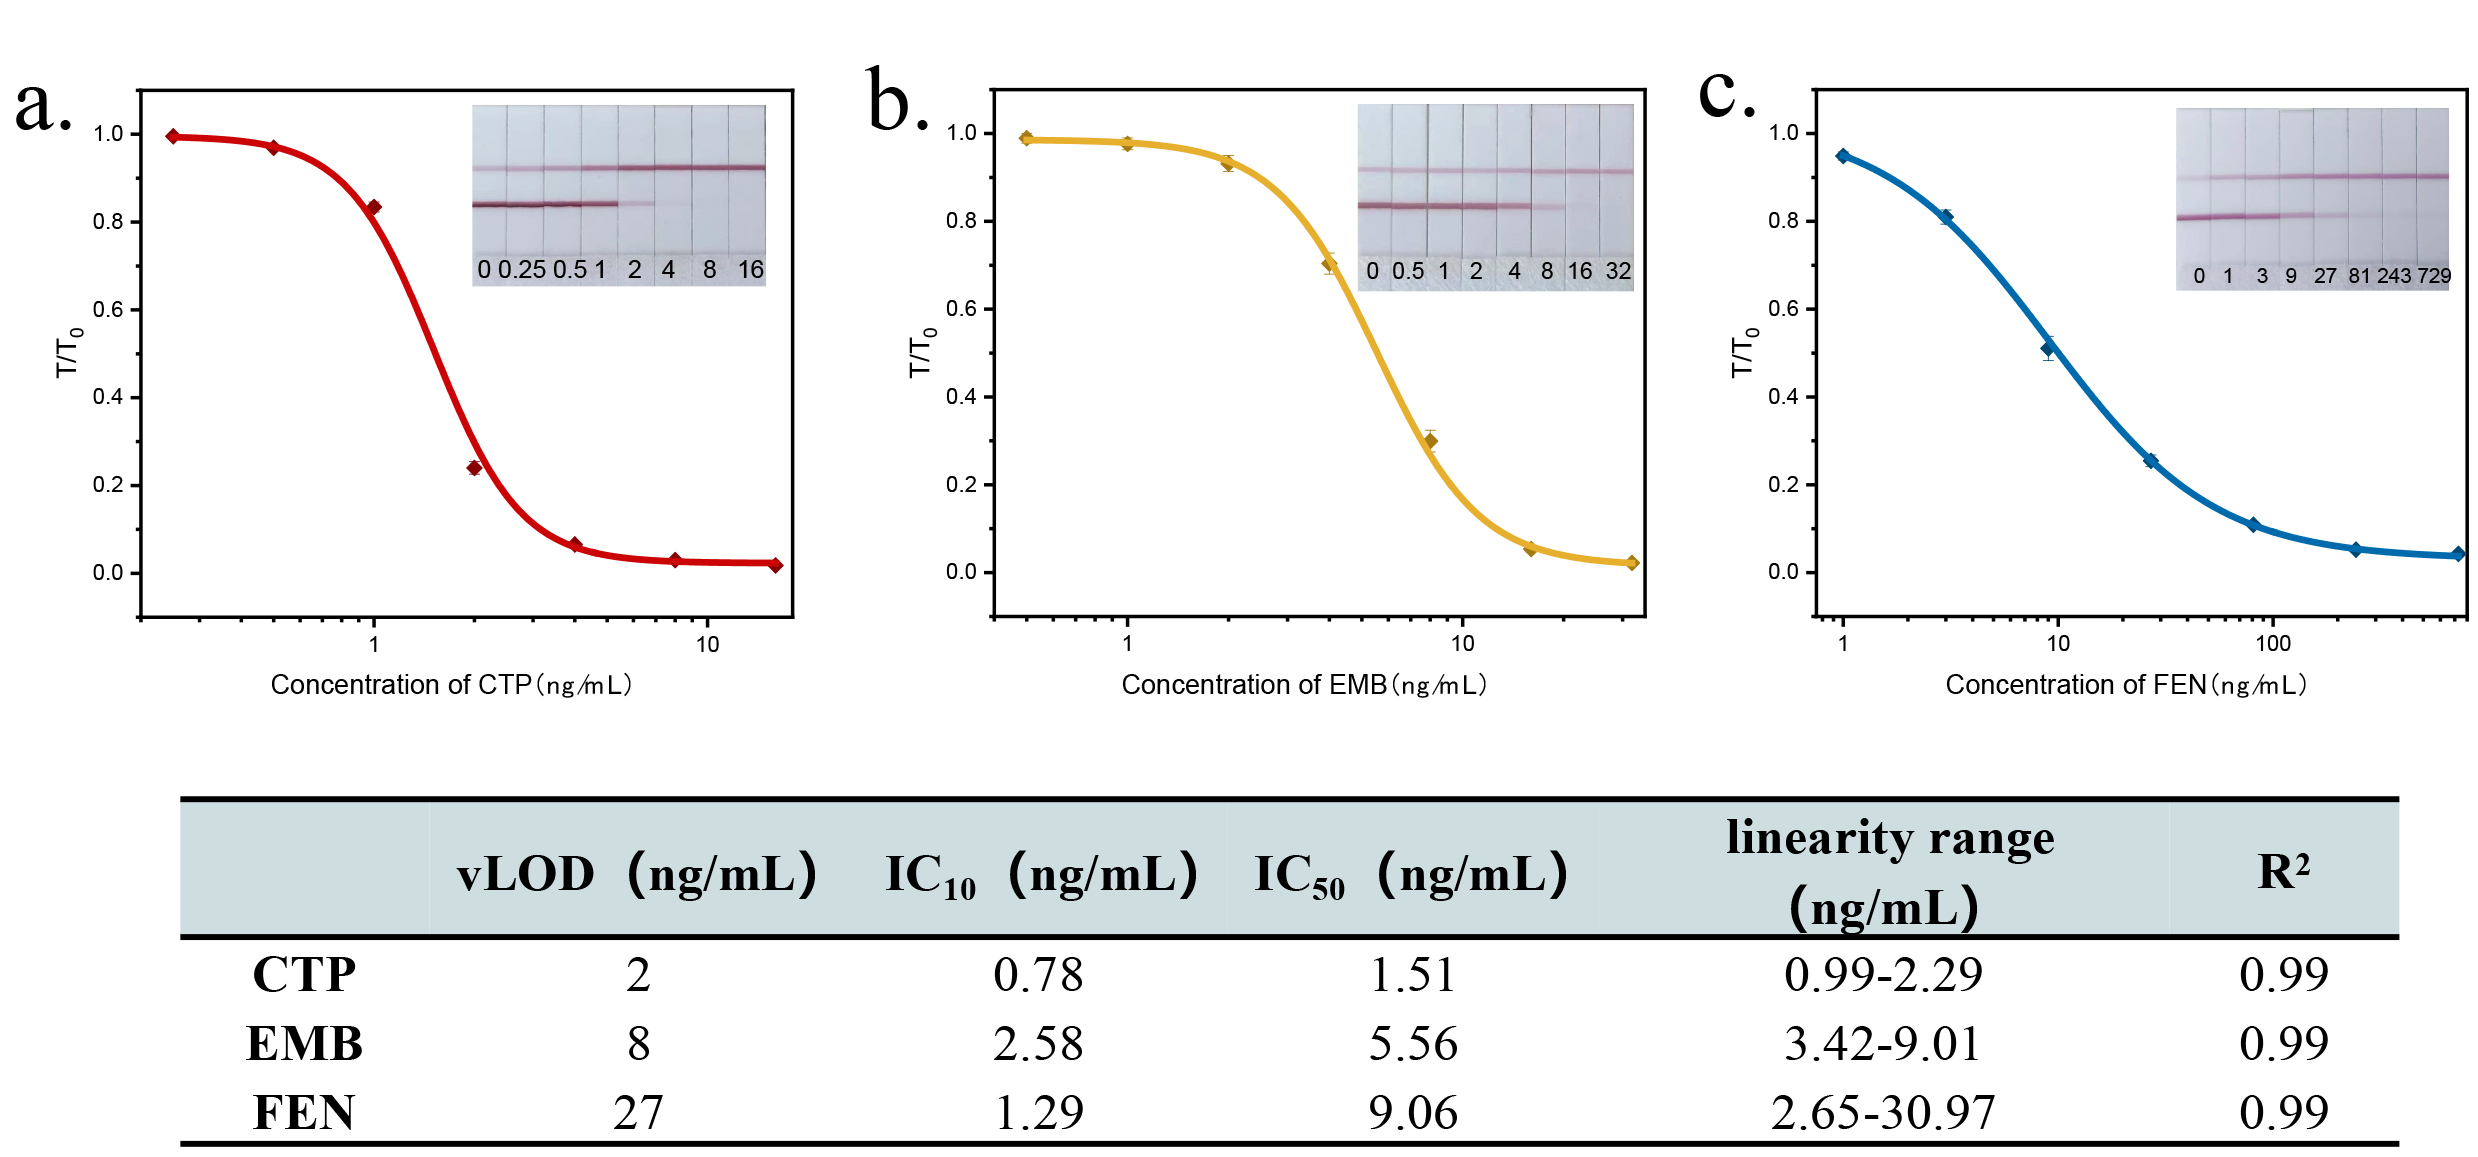


1. **Figure S3**. Standard calibration curves for single-residue detection of (a) CTP, (b) EMB, and (c) FEN, together with the corresponding calibration parameters.


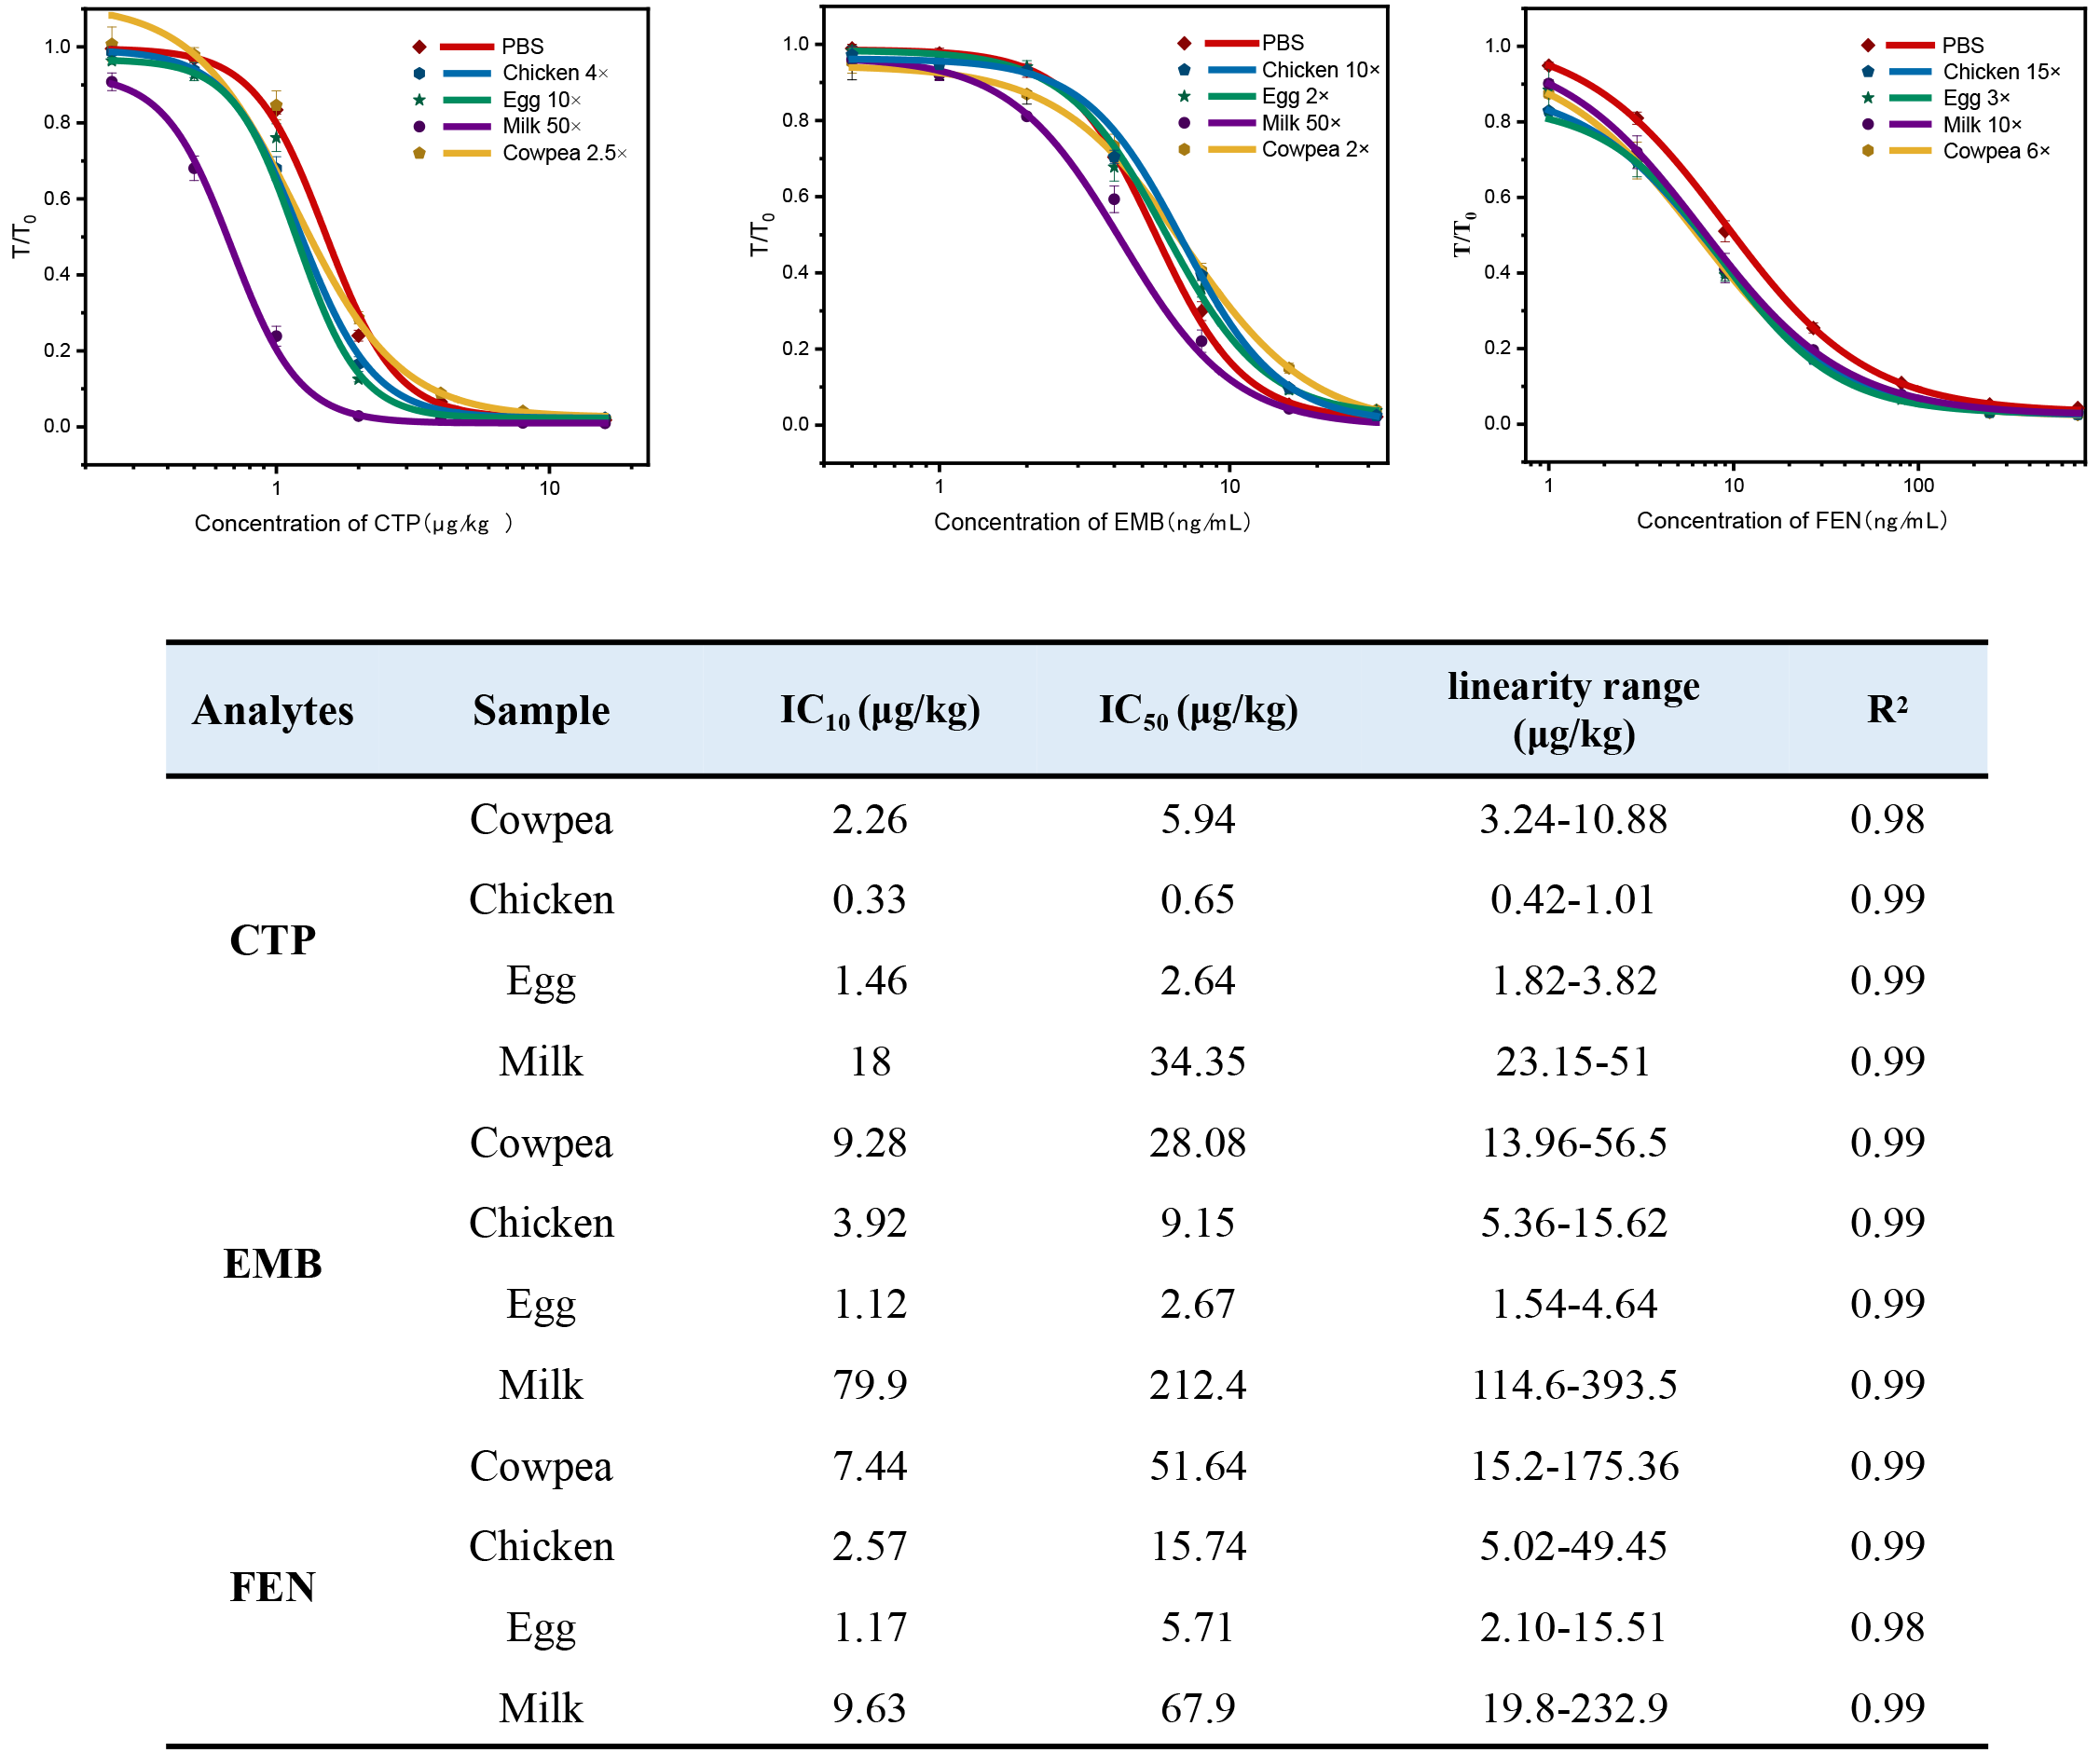


**Figure S4**. Matrix-matched calibration curves for single-residue detection of (a) CTP, (b) EMB, and (c) FEN in different sample matrices, together with the corresponding matrix calibration parameters.


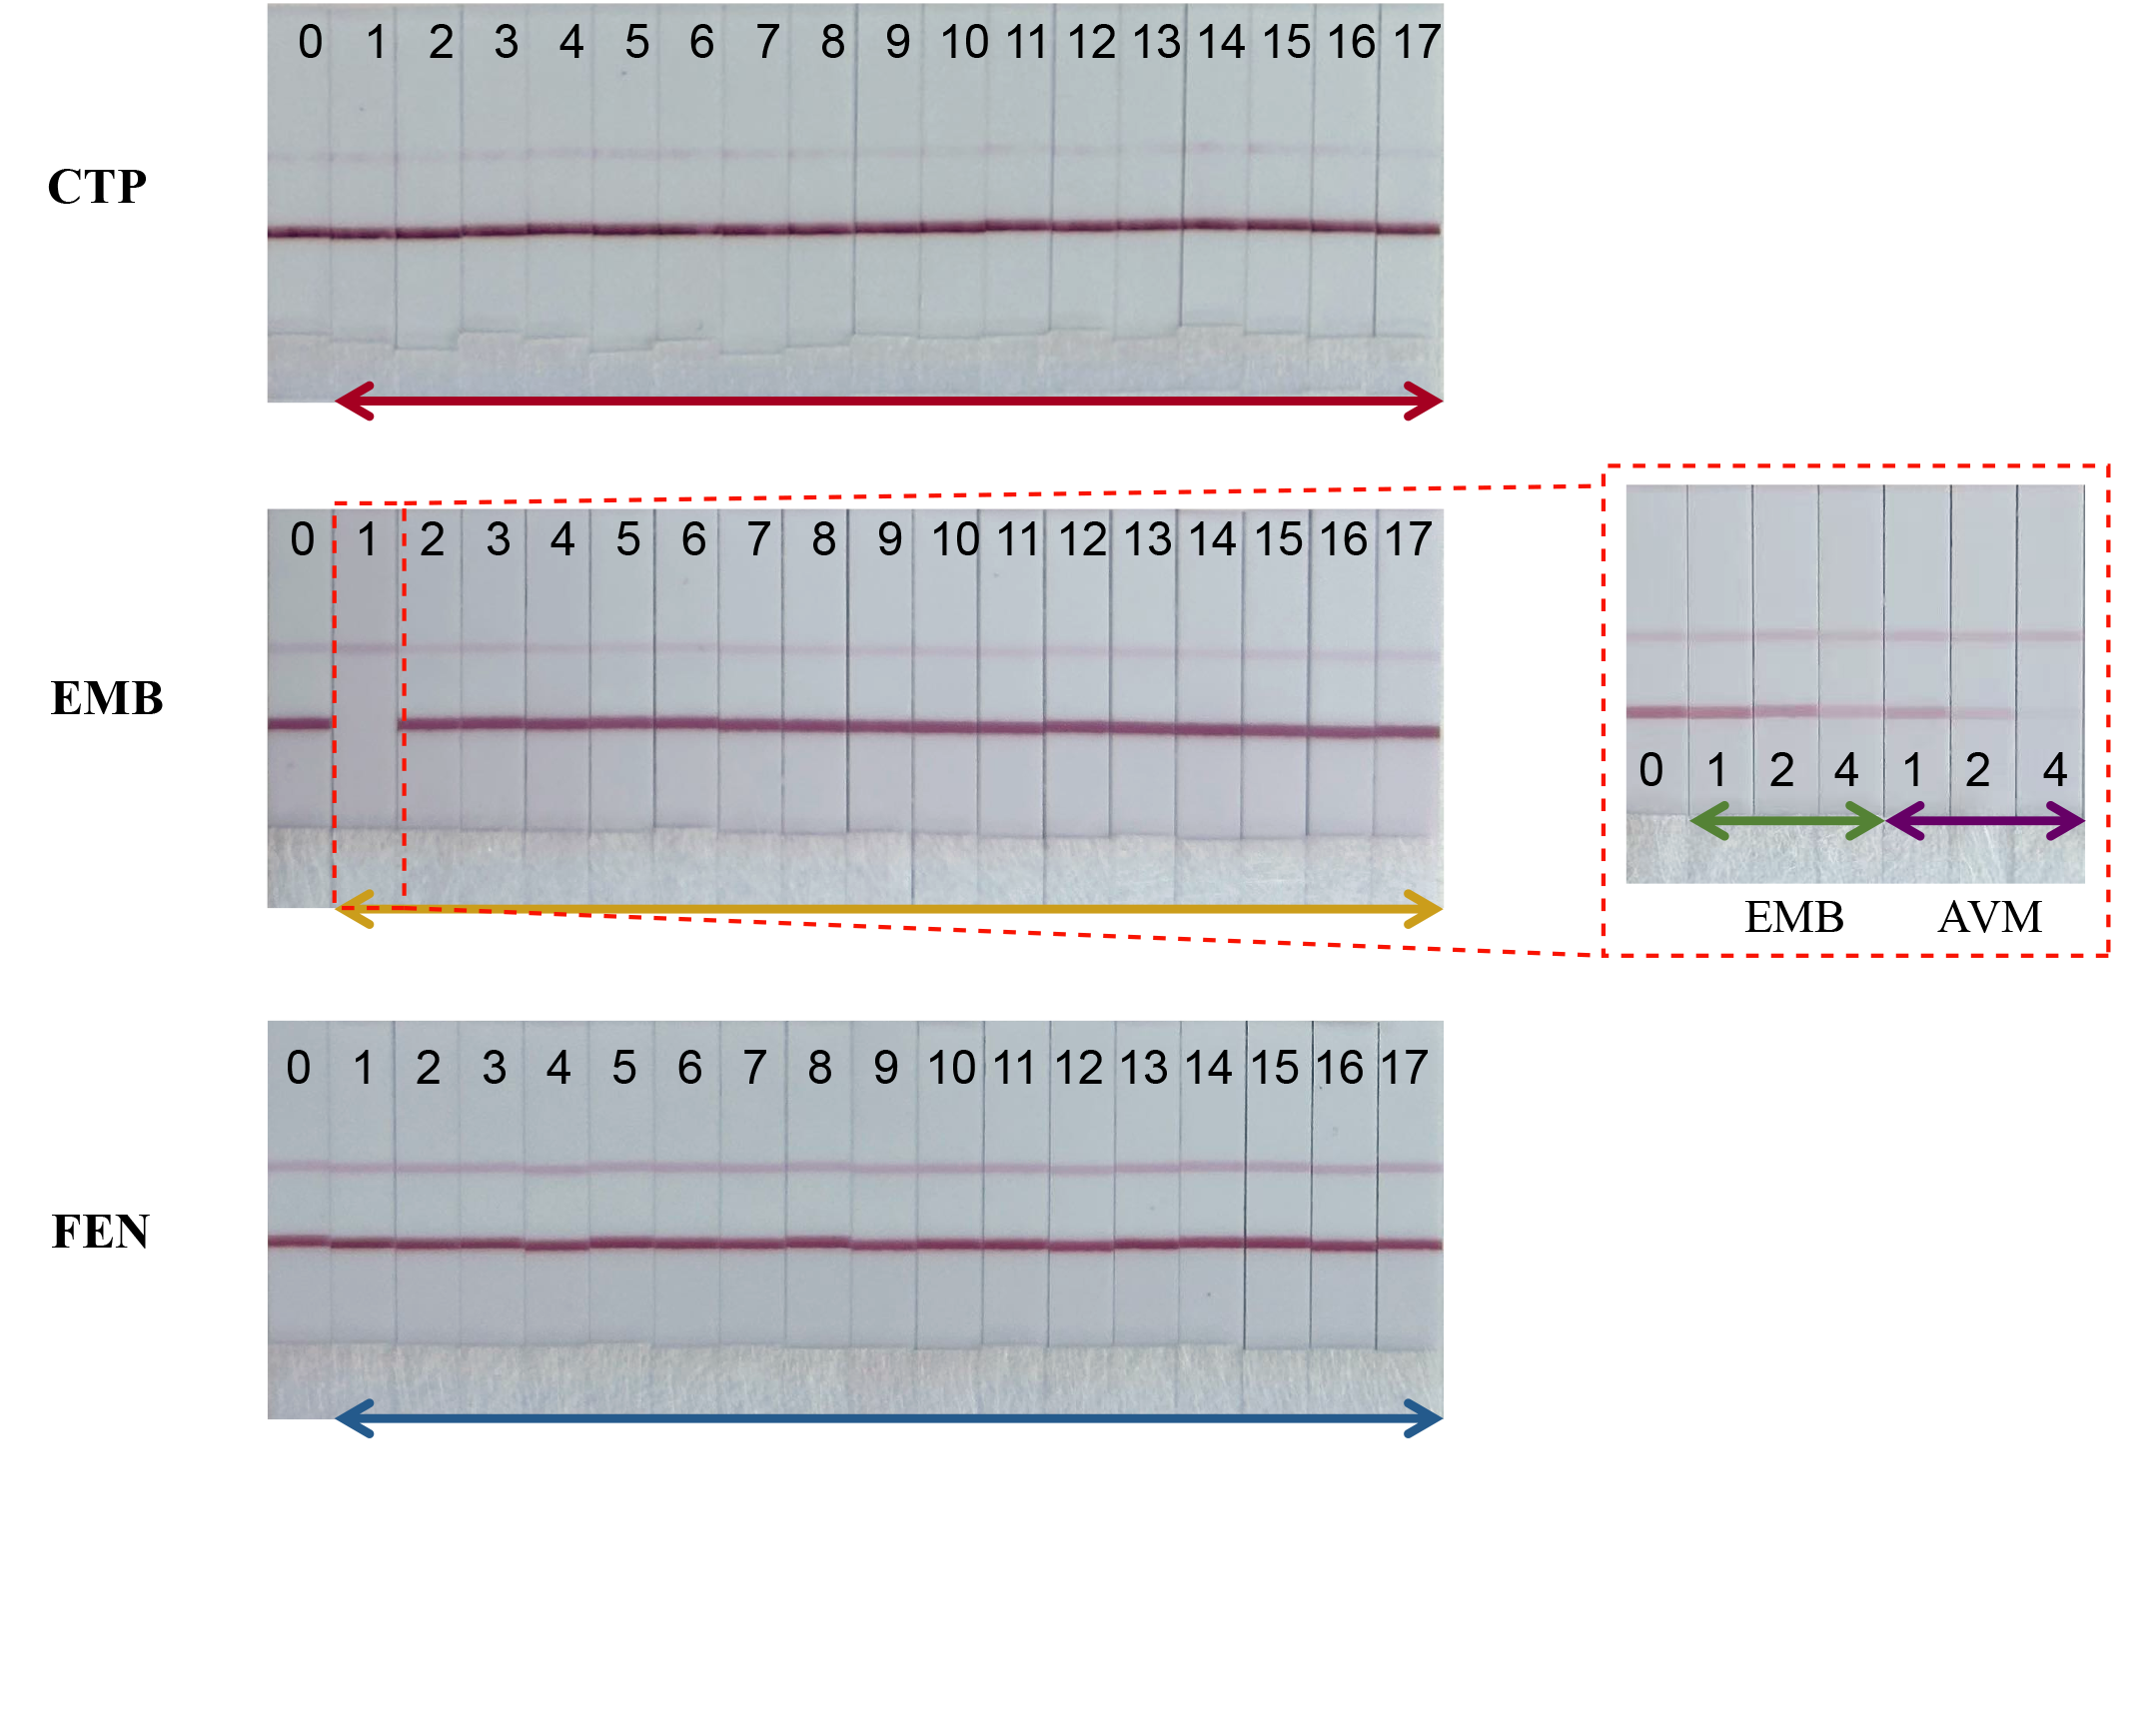


**Figure S5**. Specificity evaluation of the single-residue CG-LFIA. Lanes 1–17 correspond to the negative control, abamectin, acephate, bromophos, dichlorvos, isocarbophos, chlorthiophos, methamidophos, chlorpyrifos, dimethoate, trichlorfon, malathion, parathion, triazophos, phorate, fonofos, phoxim, and omethoate, respectively. The image on the right shows the responses of the negative control, EMB, and avermectin.
